# Supplementary material for: In situ synthesis of morphology-controlled MoOx/Fe1−xS bifunctional catalysts for high-efficiency and stable alkaline water splitting
Source: Royal Society of Chemistry journal article supplement (doi:10.1039/d2dt01098d), 2022-01-01
Supplement: d2dt01098d1.pdf [file d2dt01098d1.pdf]

## ***Supporting Information:***

### **In Situ Synthesis of Morphology-Controlled MoO<sub>x</sub>/Fe<sub>1-x</sub>S Bifunctional Catalysts for High-Efficiency and Stable Alkaline Water Splitting**

*Ying Liu*<sup>a, c#</sup>, *Xujiao Gu*<sup>a, c</sup>, *Wei Jiang*<sup>a, d</sup>, *Hongji Li*<sup>a, d</sup>, *Yunchao Ma*<sup>a, c</sup>, *Chunbo Liu*<sup>a, d\*</sup>,

*Yuanyuan Wu*<sup>a, c\*</sup>, *Guangbo Che*<sup>a, b\*</sup>

<sup>a</sup> *Key Laboratory of Preparation Application of Environmental Friendly Materials, Ministry of Education, Jilin Normal University, Siping 136000, P. R. China*

<sup>b</sup> *College of Chemistry, Baicheng Normal University, Baicheng 137000, P. R. China*

<sup>c</sup> *College of Chemistry, Jilin Normal University, Siping 13600, P. R. China*

<sup>d</sup> *College of Environmental Science and Engineering, Jilin Normal University, Changchun 130103, P. R. China*

\* Corresponding author:

Chunbo Liu ([chunboliu@jlnu.edu.cn](mailto:chunboliu@jlnu.edu.cn)); Yuanyuan Wu ([yywu16@163.com](mailto:yywu16@163.com)); Guangbo Che ([guangboche@jlnu.edu.cn](mailto:guangboche@jlnu.edu.cn)),

## Experimental Section

### Chemicals and Reagents

All chemicals were of reagent grade and used without further purifications. Pt/C, IrO<sub>2</sub>, Pluronic triblock copolymers P123, Thioacetamide (C<sub>2</sub>H<sub>5</sub>NS, TAA), Ammonium molybdate ((NH<sub>4</sub>)<sub>6</sub>Mo<sub>7</sub>O<sub>24</sub>·4H<sub>2</sub>O) were purchased from Aladdin (Shanghai, China). Fe foam (thickness: 1.5 mm) was purchased from Qinghe County Saiwei Metal Material Co., Ltd. Potassium hydroxide (KOH) and HCl were purchased from Beijing Chemical Factory. Highly purified water (>18 MΩ cm resistivity) was provided by a PALL PURELAB Plus system.

### Synthesis of MoO<sub>x</sub>/Fe<sub>1-x</sub>S/IF and MoO<sub>x</sub>/Fe<sub>1-x</sub>S/IF-1:

A piece of Fe foam (6 cm × 0.6 cm) was sonicated in 1 M HCl for 10 min to remove impurities and oxide layer on the surface. And then rinsed with anhydrous ethanol and deionized water three times each to remove any additional HCl, then left dry in the air. Ammonium molybdate (40 mg), thioacetamide (90 mg) and P123 (0.2 g) were dissolved in 60 mL of deionized water. The reaction mixture was stirred magnetically for 30 min at room temperature. The precursor solution was transferred into a 100 mL Teflon lined stainless steel autoclave loaded with a piece of Fe foam. The autoclave was sealed and maintained at 120 °C for 12 h, followed by cooling naturally (labeled as MoO<sub>x</sub>/Fe<sub>1-x</sub>S/IF). The synthesis method of MoO<sub>x</sub>/Fe<sub>1-x</sub>S/IF-1 was similar to that of MoO<sub>x</sub>/Fe<sub>1-x</sub>S/IF, except for the absence of P123 (labeled as MoO<sub>x</sub>/Fe<sub>1-x</sub>S/IF-1).

### Synthesis of Fe<sub>1-x</sub>S/IF and Fe<sub>1-x</sub>S/IF-1:

In order to determine the role of MoO<sub>x</sub> on the catalytic activity of MoO<sub>x</sub>/Fe<sub>1-x</sub>S/IF, another Fe<sub>1-x</sub>S material supported on IF (denoted Fe<sub>1-x</sub>S/IF) was prepared. Except for the amount of ammonium molybdate, the reagents and procedures used to make both materials were similar with those employed to make MoO<sub>x</sub>/Fe<sub>1-x</sub>S/IF. The synthesis method of Fe<sub>1-x</sub>S/IF-1 was similar to that of Fe<sub>1-x</sub>S/IF, except for the absence of P123 (labeled as Fe<sub>1-x</sub>S/IF-1).

### Characterization and Instrumentations:

The obtained products were examined by XRD (Thermo Fisher/Equinox 100 X-ray diffractometer with Cu Kα radiation (λ = 1.5418 Å)) at 2θ range of 20° to 80° with the scan speed of 10° min<sup>-1</sup>. Raman spectra were collected with a Renishaw 2000 System. X-ray photoelectron spectroscopy (XPS) was tested on ESCALAB 250Xi X-ray photoelectron spectrometer with a monochromatic X-ray source (Al Kα hν = 1486.6 eV). The morphology and microstructure of as-prepared products were conducted via scanning electron microscope (SEM, Regulus 8100) and transmission electron microscope (TEM, Philips-FEI Tecnai G<sub>2</sub>S-Twin microscope).

### Electrochemical Characterization:

All electrochemical tests were measured in 1 M KOH electrolyte using a traditional three-electrode setup by a CHI760E electrochemical workstation at room temperature, in which, Hg/HgO was served as the reference electrode, carbon rod as counter electrode, and the as-prepared electrodes as the working electrode. Linear sweep voltammetry (LSV) data was measured with a scan rate of 1 mV s<sup>-1</sup>. In order to prepare Pt/C and RuO<sub>2</sub> working electrode, the powder Pt/C and RuO<sub>2</sub> was dissolved and dropped on the iron foam and dried naturally. The load mass was 0.3 mg cm<sup>-2</sup>. The working electrode area was 0.09 cm<sup>2</sup>, which was the same as as-prepared working electrodes. 5 μL isopropanol solution containing 0.3% Nafion was dropped on the sample to form a protective film to prevent the sample from falling off. Electrochemical impedance spectroscopy (EIS) was carried out from 100 kHz to 0.1 Hz at an overpotential of 300 mV. The overall water splitting performances were performed in a two electrode system, and the prepared MoO<sub>x</sub>/Fe<sub>1-x</sub>S/IF-

1 samples were worked as cathode and anode, respectively.

To determine the electrochemical active surface area (ECSA) of different samples, a series of CV curves were collected at different scan rates (20 to 90  $\text{mV s}^{-1}$ ) within an appropriate potential range (0.1 V-0.2 V) where no Faradaic reaction occurred. It could be found that the relationship of the double layer current and the scan rates could be linearly fitted. The slope of this linear fitting equation was the double-layer capacitance ( $C_{dl}$ ). The ECSA was estimated to be:

$$\text{ECSA} = C_{dl} / C_s \times \text{ASA},$$

Where  $C_s$  is the specific capacitance with a value of  $0.04 \text{ mF cm}^{-2}$  in this work, and ASA is the actual surface area of the electrode.

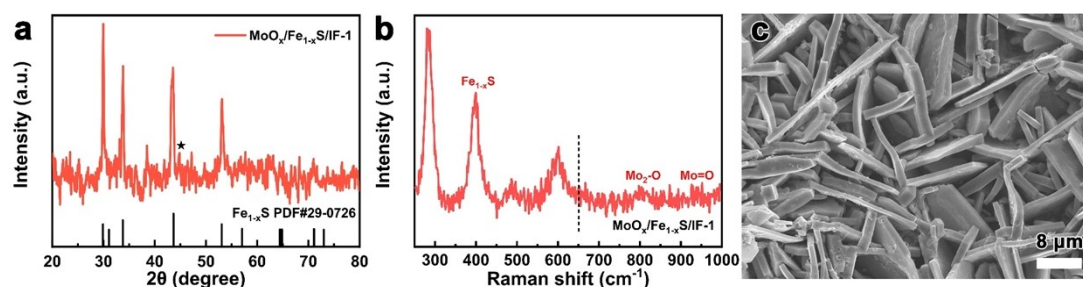

**Figure S1.** XRD pattern, Raman spectrum and SEM image of a material obtained from a control experiment. (a-c)

P123 was not involved in the reaction system, but the other reaction parameters were kept unchanged.

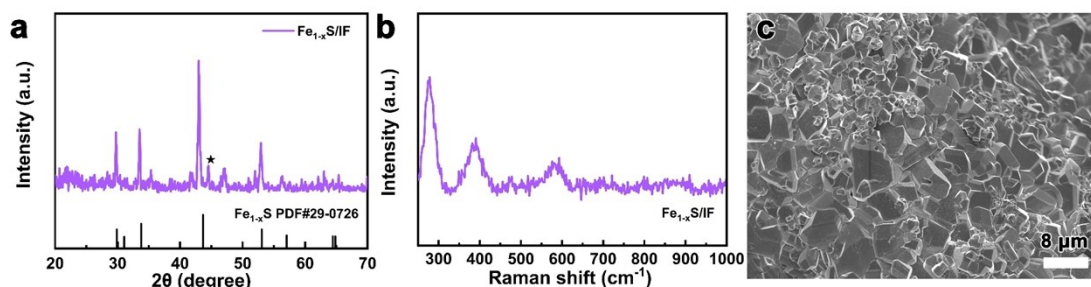

**Figure S2.** XRD pattern, Raman spectrum and SEM image of a material obtained from a control experiment. (a-c) Ammonium molybdate was not involved in the reaction system, but the other reaction parameters were kept unchanged.

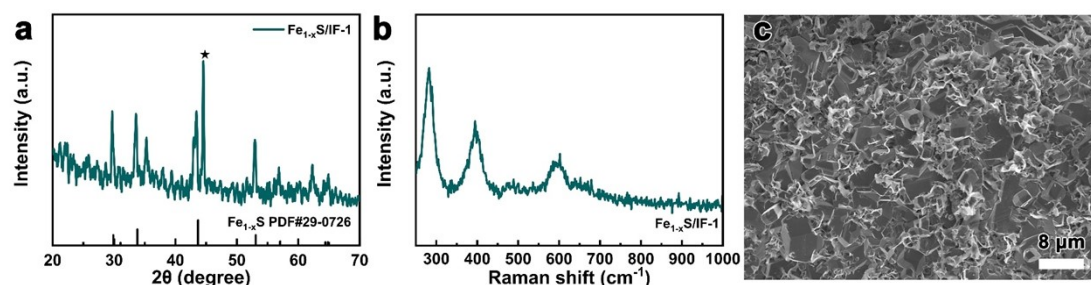

**Figure S3.** XRD pattern, Raman spectrum and SEM image of a material obtained from a control experiment. (a-c) P123 and ammonium molybdate were not involved in the reaction system, but the other reaction parameters were kept unchanged.

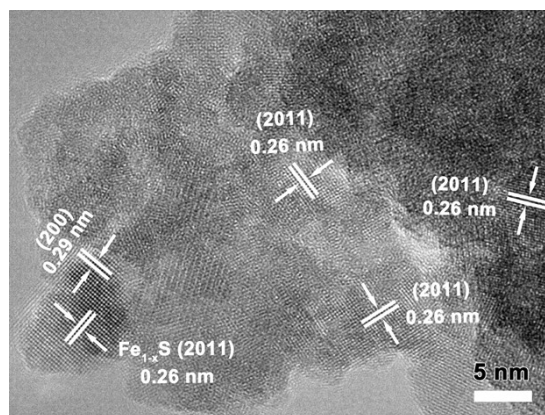

Figure S4. HRTEM of MoO<sub>x</sub>/Fe<sub>1-x</sub>S/IF.

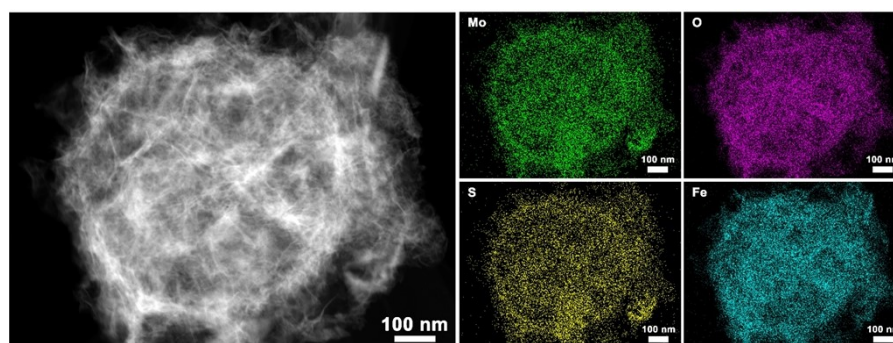

Figure S5. Corresponding element mapping of MoO<sub>x</sub>/Fe<sub>1-x</sub>S/IF.

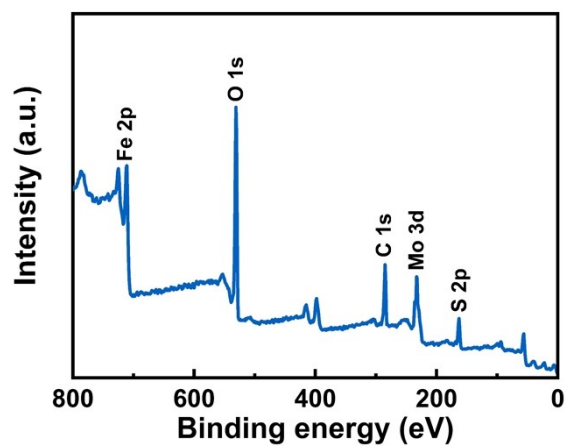

Figure S6. XPS survey spectrum of MoO<sub>x</sub>/Fe<sub>1-x</sub>S/IF.

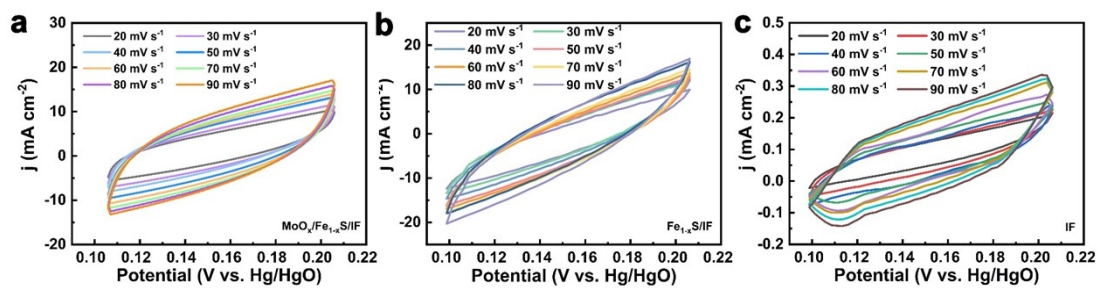

**Figure S7.** Cyclic voltammogram (CV) curves of (a) MoO<sub>x</sub>/Fe<sub>1-x</sub>S/IF, (b) Fe<sub>1-x</sub>S/IF and (c) IF catalysts electrodes in the region of 0.306 to 1.206 V vs. RHE at different scan rates in 1 M KOH solution.

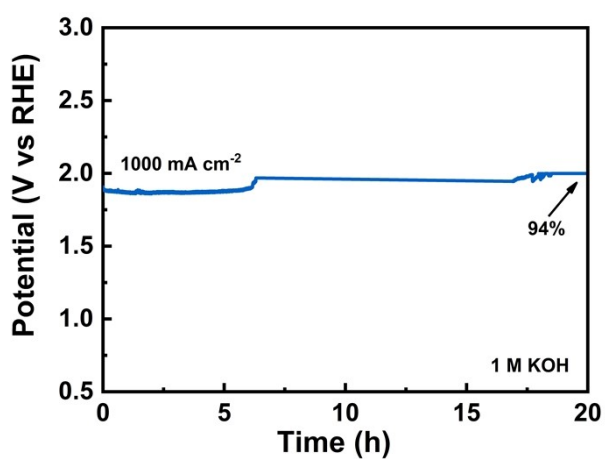

**Figure S8.** 1000 mA cm<sup>-2</sup> over 20 h of MoO<sub>x</sub>/Fe<sub>1-x</sub>S/IF in 1 M KOH.

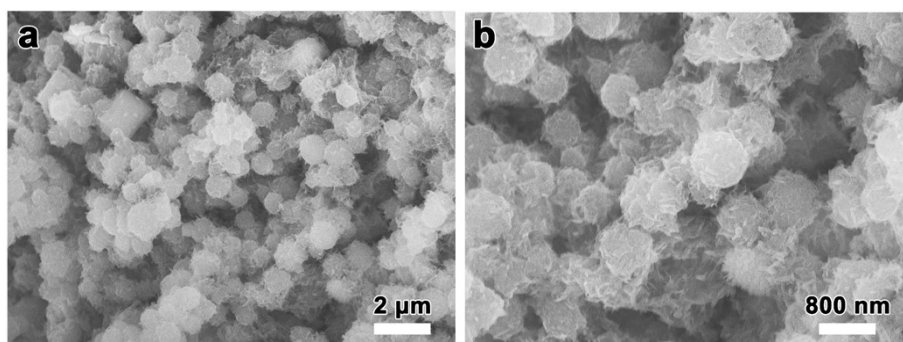

**Figure S9.** (a) Low-magnification and (b) high-magnification SEM images of MoO<sub>x</sub>/Fe<sub>1-x</sub>S/IF after long time OER test.

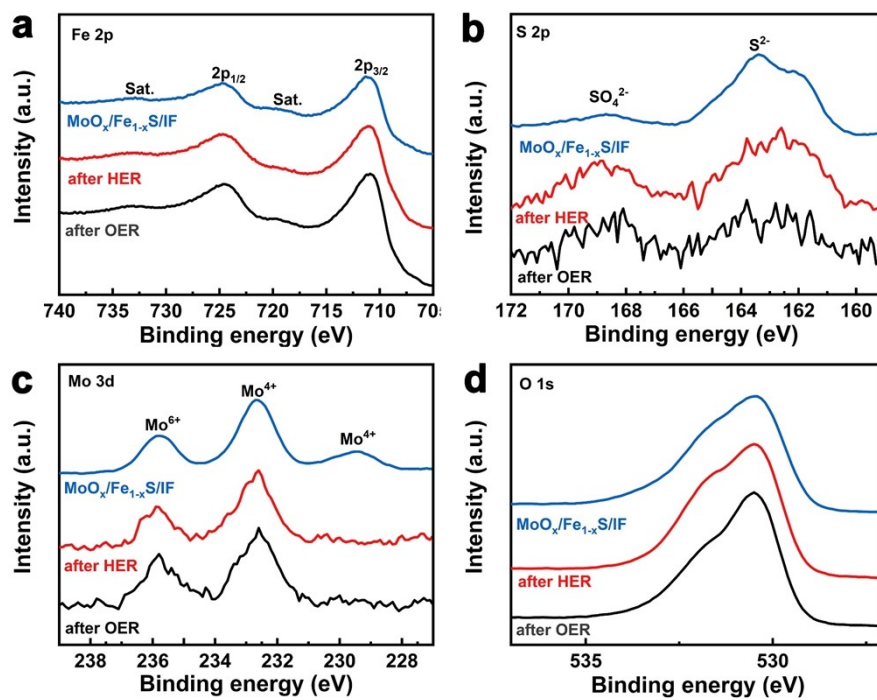

**Figure S10.** High-resolution XPS spectra of  $\text{MoO}_x/\text{Fe}_{1-x}\text{S}/\text{IF}$  before and post OER and HER test. (a) Fe 2p, (b) S 2p, (c) Mo 3d and (d) O 1s.

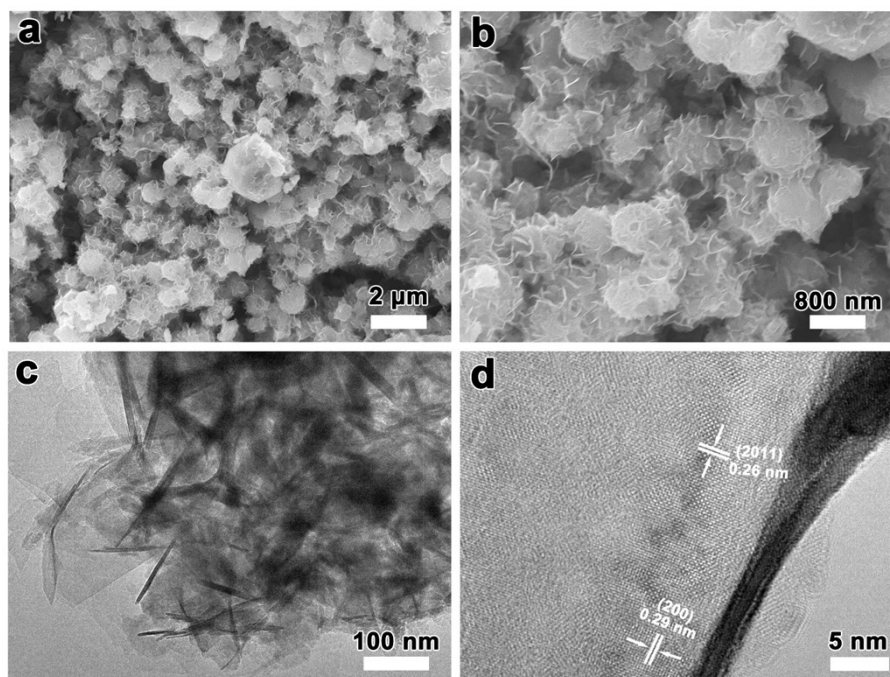

**Figure S11.** (a) Low-magnification and (b) high-magnification SEM, (c) TEM, (d) HRTEM images of  $\text{MoO}_x/\text{Fe}_{1-x}\text{S}/\text{IF}$  after long time HER test.

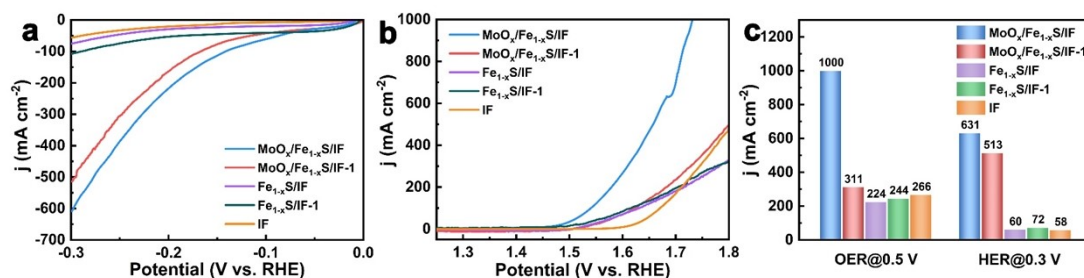

**Figure S12.** (a) 85% iR corrected HER polarization curves, (b) OER polarization curves and (c) Comparison of overpotentials at current densities of OER@0.5 V and HER@0.3 V for MoO<sub>x</sub>/Fe<sub>1-x</sub>S/IF, MoO<sub>x</sub>/Fe<sub>1-x</sub>S/IF-1, Fe<sub>1-x</sub>S/IF, Fe<sub>1-x</sub>S/IF-1 and IF.

**Table S1.** The simulated series resistance ( $R_s$ ), charge transfer resistance ( $R_{ct}$ ) based on the Nyquist plots (Figure 3c) and ECSA in the presence of MoO<sub>x</sub>/Fe<sub>1-x</sub>S/IF, Fe<sub>1-x</sub>S/IF and IF catalysts.

| Catalyst                                 | $R_s$ ( $\Omega$ cm <sup>2</sup> ) | $R_{ct}$ ( $\Omega$ cm <sup>2</sup> ) | ECSA |
|------------------------------------------|------------------------------------|---------------------------------------|------|
| MoO <sub>x</sub> /Fe <sub>1-x</sub> S/IF | 0.28                               | 1.8                                   | 153  |
| Fe <sub>1-x</sub> S/IF                   | 0.306                              | 4.44                                  | 108  |
| IF                                       | 0.4                                | 118                                   | 2.9  |

**Table S2.** Comparison of electrochemical performance of MoO<sub>x</sub>/Fe<sub>1-x</sub>S/IF in 1 M KOH with other reported highly active bifunctional electrocatalysts.

| Catalyst                                           | substrate | HER/OER | Overpotentials( $\eta$ ) at the corresponding ( $j$ )                                                  | Stability at $j$ (mA cm <sup>-2</sup> ) | Reference                                            |
|----------------------------------------------------|-----------|---------|--------------------------------------------------------------------------------------------------------|-----------------------------------------|------------------------------------------------------|
| MoO <sub>x</sub> /Fe <sub>1-x</sub> S/IF           | IF        | HER     | 142 mV@100 mA cm <sup>-2</sup><br>277 mV @500 mA cm <sup>-2</sup>                                      | 100 h                                   | This work                                            |
|                                                    |           | OER     | 300 mV @100 mA cm <sup>-2</sup><br>320 mV @500 mA cm <sup>-2</sup><br>500 mV @1000 mA cm <sup>-2</sup> | 17 h                                    |                                                      |
|                                                    |           | OWS     | 1.56 V@10 mA cm <sup>-2</sup>                                                                          | 110 h                                   |                                                      |
| Ni <sub>0.7</sub> Fe <sub>0.3</sub> S <sub>2</sub> | NF        | HER     | 155 mV @10 mA cm <sup>-2</sup>                                                                         | ≈13.8 h                                 | J. Mater. Chem. A, <b>2017</b> , 5: 15838-15844      |
|                                                    |           | OER     | 287 mV @100 mA cm <sup>-2</sup>                                                                        | ≈13.8 h                                 |                                                      |
|                                                    |           | OWS     | 1.625 V@10 mA cm <sup>-2</sup>                                                                         | ≈14 h h                                 |                                                      |
| (Ni, Fe)S <sub>2</sub> @MoS <sub>2</sub>           | CFP       | HER     | 130 mV @10 mA cm <sup>-2</sup>                                                                         | 44 h                                    | Appl. Catal. B: Environ., <b>2019</b> , 247: 107-114 |

|                                              |     |     |                                 |             |                                                       |
|----------------------------------------------|-----|-----|---------------------------------|-------------|-------------------------------------------------------|
|                                              |     | OER | 330 mV @100 mA cm <sup>-2</sup> | 44 h        |                                                       |
|                                              |     | OWS | 1.56 V@10 mA cm <sup>-2</sup>   | --          |                                                       |
| <b>FS-0.9-30</b>                             | NF  | HER | 157 mV @10 mA cm <sup>-2</sup>  | 1000 cycles | ACS Sustain. Chem. Eng., <b>2019</b> , 7: 18015-18026 |
|                                              |     | OER | 255 mV @100 mA cm <sup>-2</sup> | 1000 cycles |                                                       |
|                                              |     | OWS | 1.727 V@10 mA cm <sup>-2</sup>  | ≈11 h       |                                                       |
| <b>100-NCT-NiCo<sub>2</sub>S<sub>4</sub></b> | PAN | HER | 183 mV @10 mA cm <sup>-2</sup>  | 12 h        | Carbon, <b>2019</b> , 145: 521-528                    |
|                                              |     | OER | 330 mV @100 mA cm <sup>-2</sup> | 50 h        |                                                       |
|                                              |     | OWS | 1.6 V@10 mA cm <sup>-2</sup>    | 15 h        |                                                       |
| <b>FeP<sub>x</sub>@Fe</b>                    | IF  | HER | 124 mV @10 mA cm <sup>-2</sup>  | 24 h        | J. Mater. Sci., <b>2019</b> , 54: 14872-14883         |
|                                              |     | OER | 274 mV @10 mA cm <sup>-2</sup>  | 24 h        |                                                       |
|                                              |     | OWS | 1.67 V @10 mA cm <sup>-2</sup>  | 5 h         |                                                       |
| <b>V-Ni<sub>3</sub>S<sub>2</sub>@NiO/NF</b>  | NF  | HER | 239 mV @100 mA cm <sup>-2</sup> | 50 h        | ACS Sustain. Chem. Eng., <b>2020</b> , 8: 6222-6233   |
|                                              |     | OER | 310 mV @100 mA cm <sup>-2</sup> | 100 h       |                                                       |
|                                              |     | OWS | 1.52 V @10 mA cm <sup>-2</sup>  | 55 h        |                                                       |
| <b>FeS/NiS/NF</b>                            | NF  | HER | 202 mV @10 mA cm <sup>-2</sup>  | 20 h        | Electrochim. Acta, <b>2020</b> , 332: 135534          |
|                                              |     | OER | 231 mV @10 mA cm <sup>-2</sup>  | 20 h        |                                                       |
|                                              |     | OWS | 1.58 V@10 mA cm <sup>-2</sup>   | 10 h        |                                                       |
| <b>Co-Ni<sub>3</sub>S<sub>2</sub></b>        | NF  | HER | 158 mV @100 mA cm <sup>-2</sup> | 30 h        | Small, <b>2021</b> , 17: 2102097                      |
|                                              |     | OER | 335 mV @100 mA cm <sup>-2</sup> | 25 h        |                                                       |
|                                              |     | OWS | 1.54 V@10 mA cm <sup>-2</sup>   | 100 h       |                                                       |



|                                                                           |    |     |                                                                    |       |                                                        |
|---------------------------------------------------------------------------|----|-----|--------------------------------------------------------------------|-------|--------------------------------------------------------|
| <b>Ni<sub>3</sub>S<sub>2</sub>@FeNi<sub>2</sub>S<sub>4</sub>@NF</b>       | NF | HER | 143 mV @20 mA cm <sup>-2</sup>                                     | 12 h  | J. Colloid Interf. Sci. <b>2021</b> , 599: 300–312     |
|                                                                           |    | OER | 379 mV @100 mA cm <sup>-2</sup>                                    | --    |                                                        |
|                                                                           |    | OWS | 1.89 V@100 mA cm <sup>-2</sup>                                     | 24 h  |                                                        |
| <b>V-Ni<sub>3</sub>Se<sub>2</sub>/NF</b>                                  | NF | HER | 275 mV @500 mA cm <sup>-2</sup>                                    | 80 h  | ACS Sustain. Chem. Eng., <b>2021</b> , 9: 12005-12016  |
|                                                                           |    | OER | 370 mV @500 mA cm <sup>-2</sup>                                    | 80 h  |                                                        |
|                                                                           |    | OWS | 1.56 V@10 mA cm <sup>-2</sup>                                      | 80 h  |                                                        |
| <b>NiCoS<sub>x</sub>@CoCH NAs/NF</b>                                      | NF | HER | 199 mV @100 mA cm <sup>-2</sup><br>338 mV @500 mA cm <sup>-2</sup> | 500 h | ACS Appl. Mater. Inter., <b>2021</b> , 13: 35647-35656 |
| <b>(Ni<sub>x</sub>Fe<sub>y</sub>Co<sub>6-x-y</sub>)Mo<sub>6</sub>C/NF</b> | NF | OER | 336 mV @500 mA cm <sup>-2</sup>                                    | 50 h  | Appl. Catal. B: Environ., <b>2021</b> , 290: 120049    |
| <b>Ni<sub>2</sub>P-Ni<sub>12</sub>P<sub>5</sub>/NF</b>                    | NF | HER | 147 mV @100 mA cm <sup>-2</sup>                                    | 11 h  | Small, <b>2021</b> , 17(6): 2006770                    |
| <b>Ni<sub>0.67</sub>Co<sub>0.33</sub>/Ni<sub>3</sub>S<sub>2</sub>@NF</b>  | NF | HER | 203 mV @100 mA cm <sup>-2</sup>                                    | 11 h  | Small, <b>2022</b> : 2106904                           |
